# Supplementary material for: Efficacy and Safety of a Fixed-Dose Clindamycin Phosphate 1.2%, Benzoyl Peroxide 3.1%, and Adapalene 0.15% Gel for Moderate-to-Severe Acne: A Randomized Phase II Study of the First Triple-Combination Drug
Source: Springer Nature journal article supplement (doi:10.1007/s40257-021-00650-3), 2021-10-21

## Electronic Supplementary material for the manuscript titled:

### **Efficacy and Safety of a Fixed-Dose Clindamycin 1.2%, Benzoyl Peroxide 3.1%, and Adapalene 0.15% Gel for Moderate-to-Severe Acne: A Randomized Phase II Study of the First Triple-Combination Drug**

Linda Stein Gold, MD<sup>1</sup>; Hilary Baldwin, MD<sup>2,3</sup>; Leon H Kircik, MD<sup>4-6</sup>; Jonathan S Weiss, MD<sup>7,8</sup>; David M Pariser, MD<sup>9,10</sup>; Valerie Callender, MD<sup>11,12</sup>; Edward Lain, MD, MBA<sup>13</sup>; Michael Gold, MD<sup>14</sup>; Kenneth Beer, MD<sup>15</sup>; Zoe Draelos, MD<sup>16</sup>; Neil Sadick, MD<sup>17,18</sup>; Radhakrishnan Pillai, PhD<sup>19</sup>; Varsha Bhatt, PhD<sup>19</sup>; Emil A Tanghetti, MD<sup>20</sup>

<sup>1</sup>Henry Ford Hospital, Detroit, MI

<sup>2</sup>The Acne Treatment and Research Center, Brooklyn, NY

<sup>3</sup>Robert Wood Johnson University Hospital, New Brunswick, NJ

<sup>4</sup>Indiana University School of Medicine, Indianapolis, IN

<sup>5</sup>Physicians Skin Care, PLLC, Louisville, KY

<sup>6</sup>Icahn School of Medicine at Mount Sinai, New York, NY

<sup>7</sup>Georgia Dermatology Partners, Snellville, GA

<sup>8</sup>Gwinnett Clinical Research Center, Inc., Snellville, GA

<sup>9</sup>Eastern Virginia Medical School Norfolk, VA

<sup>10</sup>Virginia Clinical Research, Inc., Norfolk, VA

<sup>11</sup>Callender Dermatology and Cosmetic Center, Glenn Dale, MD

<sup>12</sup>Howard University College of Medicine, Washington DC

<sup>13</sup>Austin Institute for Clinical Research, Austin, TX

<sup>14</sup>Tennessee Clinical Research Center, Nashville, TN

<sup>15</sup>University of Miami Miller School of Medicine, Miami, FL

<sup>16</sup>Dermatology Consulting Services, PLLC, High Point, NC

<sup>17</sup>Weill Cornell Medical College, New York, NY

<sup>18</sup>Sadick Dermatology, New York, NY

<sup>19</sup>Bausch Health US, LLC, Petaluma, CA

<sup>20</sup>Center for Dermatology and Laser Surgery, Sacramento, CA

**Corresponding Author:** Linda Stein Gold, MD

Affiliation: Henry Ford Hospital, Detroit, MI. Address: 6530 Farmington Rd, Ste 101 West Bloomfield, MI 48322. Telephone: (248) 661-8764. Email: LSTEIN1@hfhs.org

**eFigure 1. Treatment success by visit ( $\geq 2$ -grade reduction from baseline in EGSS and a score of 0 [clear] or 1 [almost clear]) (ITT population).**

Multiple imputation was used to impute missing values. \* $P < 0.05$ , \*\* $P < 0.01$ , \*\*\* $P \leq 0.001$  vs IDP-126. Data not shown: all active dyad treatments were significant versus vehicle at weeks 8 and 12 ( $P \leq 0.001$ , all); additionally, BPO/ADAP was significant versus vehicle at week 4 and CLIN/ADAP was significant versus vehicle at week 2 ( $P < 0.05$ , both).

ADAP adapalene 0.15%, BPO benzoyl peroxide 3.1%, CLIN clindamycin phosphate 1.2%, EGSS Evaluator's Global Severity Score, IDP-126 clindamycin phosphate 1.2%/benzoyl peroxide 3.1%/adapalene 0.15%, ITT intent to treat.

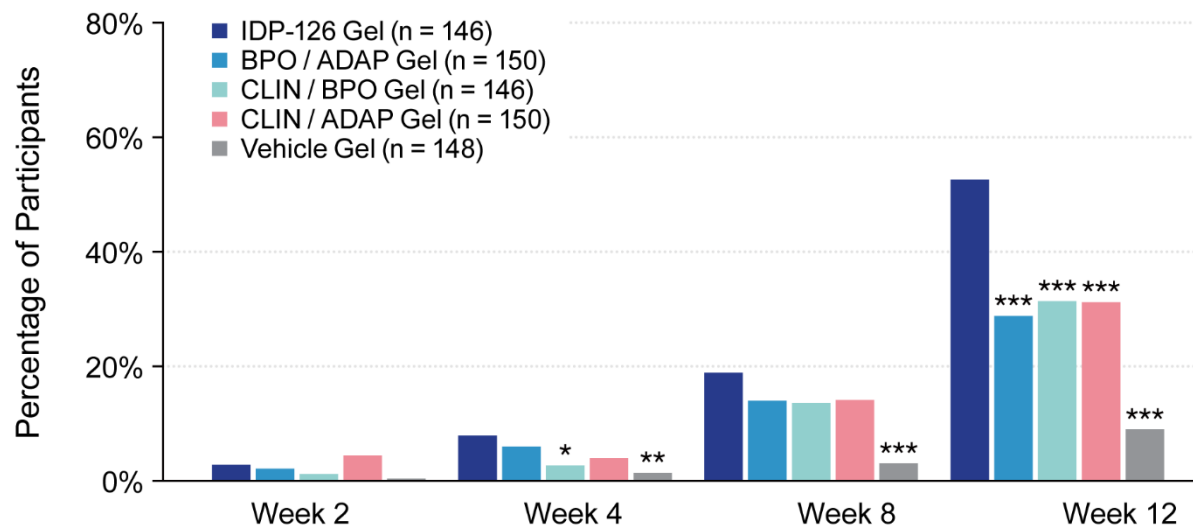

**eFigure 2. Summary of cutaneous safety and tolerability evaluations.**

No imputation of missing values (N values shown for baseline only). Data not shown for hyperpigmentation and hypopigmentation as there were no trends in transient increases over time.

*ADAP* adapalene 0.15%, *BPO* benzoyl peroxide 3.1%, *CLIN* clindamycin phosphate 1.2%, *IDP-126* clindamycin phosphate 1.2%/benzoyl peroxide 3.1%/adapalene 0.15%.

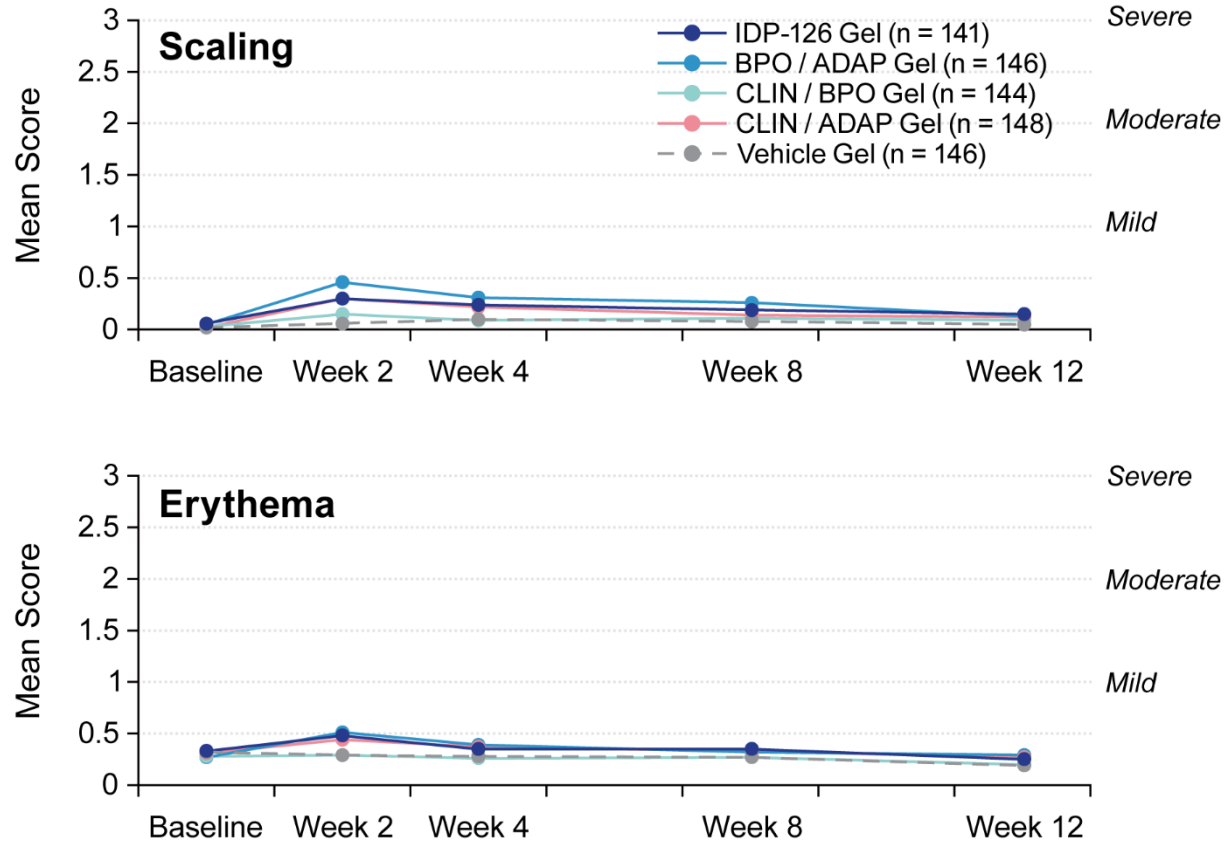

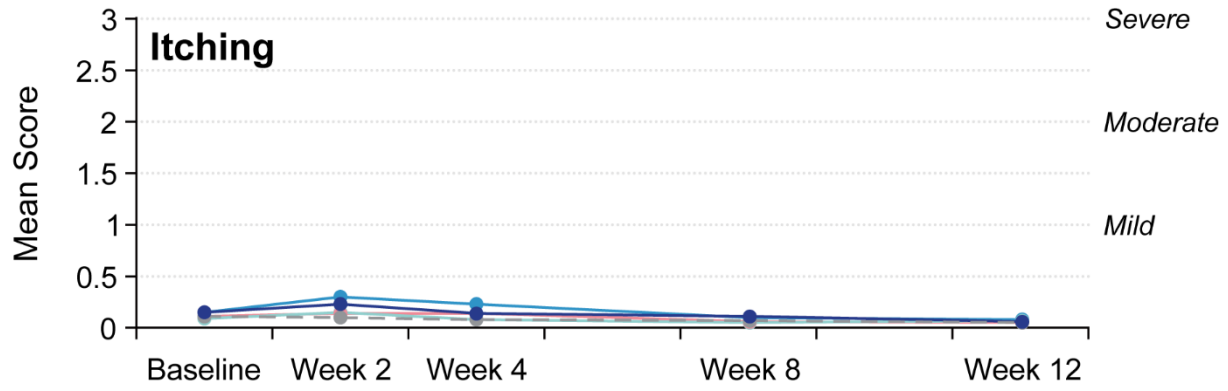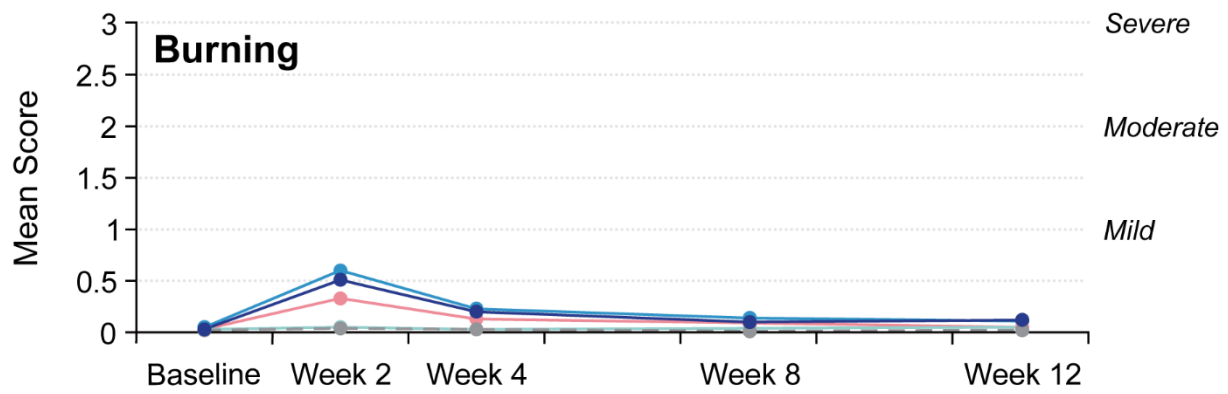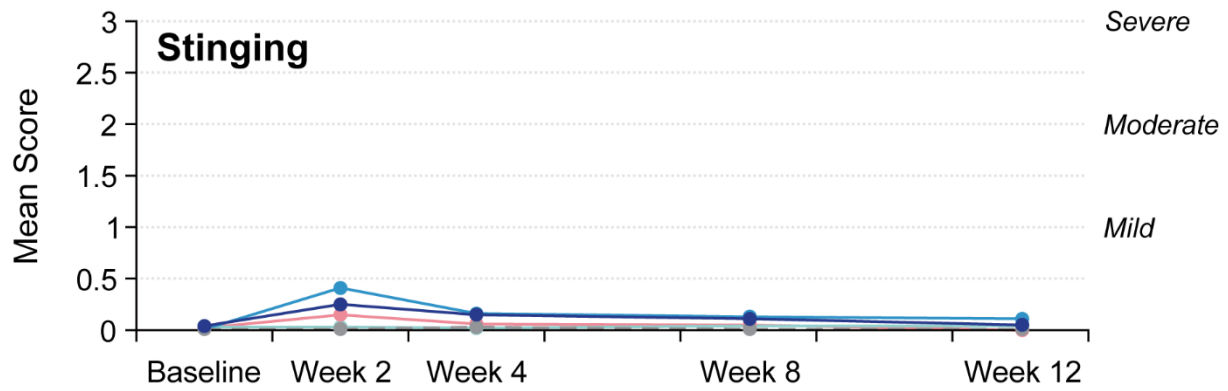

Supplement: MOESM1 [file 19780958]
